# Supplementary material
Source: publisher figshare collection journal article supplement (https://tandf.figshare.com/ndownloader/files/15539627)
Supplement: Supplementary file 1 [file 15539627]

Supplemental Table S1

*Descriptive Statistics for Internal Meta-Analysis 1: Wristband x Target on Speeded Evaluations*

| *Study* | *Factor1* | *Factor2* | *M* | *SD* | *N* | *wi* |
| --- | --- | --- | --- | --- | --- | --- |
| 1 | Off | Bob | 0.482147 | 0.394075 | 154 | 1 |
| 1 | Off | Novel | 0.607959 | 0.243125 | 154 | 1 |
| 1 | On | Bob | 0.434202 | 0.377986 | 154 | 1 |
| 1 | On | Novel | 0.613846 | 0.240811 | 154 | 1 |
| 2 | Off | Bob | 0.59169 | 0.332714 | 242 | 2 |
| 2 | Off | Novel | 0.501917 | 0.252675 | 242 | 2 |
| 2 | On | Bob | 0.58144 | 0.334219 | 242 | 2 |
| 2 | On | Novel | 0.487358 | 0.25645 | 242 | 2 |
| 3 | Off | Bob | 0.49078 | 0.348187 | 234 | 3 |
| 3 | Off | Novel | 0.479229 | 0.262214 | 234 | 3 |
| 3 | On | Bob | 0.430687 | 0.347604 | 234 | 3 |
| 3 | On | Novel | 0.506675 | 0.279495 | 234 | 3 |
| 4 | Off | Bob | 0.419506 | 0.343638 | 122 | 4 |
| 4 | Off | Novel | 0.475137 | 0.247648 | 122 | 4 |
| 4 | On | Bob | 0.450005 | 0.354011 | 118 | 5 |
| 4 | On | Novel | 0.480919 | 0.237339 | 118 | 5 |

*Factor1* = Wristband, *Factor 2* = Target, *wi* = Within-subjects indicator.

Supplemental Table S2

*Internal Meta-Analysis 1: Estimated Variance-Covariance Matrix*

| *Study* | *Factor 1* | *Factor2* | *Study* | *Factor1* | *Factor2* | *Covariance* |
| --- | --- | --- | --- | --- | --- | --- |
| 1 | Off | Bob | 1 | Off | Novel | 0 |
| 1 | Off | Bob | 1 | On | Bob | 0.126701 |
| 1 | Off | Bob | 1 | On | Novel | 0 |
| 1 | Off | Novel | 1 | Off | Bob | 0 |
| 1 | Off | Novel | 1 | On | Bob | 0 |
| 1 | Off | Novel | 1 | On | Novel | 0.044604 |
| 1 | On | Bob | 1 | Off | Bob | 0.126701 |
| 1 | On | Bob | 1 | Off | Novel | 0 |
| 1 | On | Bob | 1 | On | Novel | 0 |
| 1 | On | Novel | 1 | Off | Bob | 0 |
| 1 | On | Novel | 1 | Off | Novel | 0.044604 |
| 1 | On | Novel | 1 | On | Bob | 0 |
| 2 | Off | Bob | 2 | Off | Novel | 0 |
| 2 | Off | Bob | 2 | On | Bob | 0.101071 |
| 2 | Off | Bob | 2 | On | Novel | 0.002005 |
| 2 | Off | Novel | 2 | Off | Bob | 0 |
| 2 | Off | Novel | 2 | On | Bob | 0 |
| 2 | Off | Novel | 2 | On | Novel | 0.051397 |
| 2 | On | Bob | 2 | Off | Bob | 0.101071 |
| 2 | On | Bob | 2 | Off | Novel | 0 |
| 2 | On | Bob | 2 | On | Novel | 0 |
| 2 | On | Novel | 2 | Off | Bob | 0.002005 |
| 2 | On | Novel | 2 | Off | Novel | 0.051397 |
| 2 | On | Novel | 2 | On | Bob | 0 |
| 3 | Off | Bob | 3 | Off | Novel | 0 |
| 3 | Off | Bob | 3 | On | Bob | 0.105258 |
| 3 | Off | Bob | 3 | On | Novel | 0 |
| 3 | Off | Novel | 3 | Off | Bob | 0 |
| 3 | Off | Novel | 3 | On | Bob | 0 |
| 3 | Off | Novel | 3 | On | Novel | 0.05716 |
| 3 | On | Bob | 3 | Off | Bob | 0.105258 |
| 3 | On | Bob | 3 | Off | Novel | 0 |
| 3 | On | Bob | 3 | On | Novel | 0 |
| 3 | On | Novel | 3 | Off | Bob | 0 |
| 3 | On | Novel | 3 | Off | Novel | 0.05716 |
| 3 | On | Novel | 3 | On | Bob | 0 |
| 4 | Off | Bob | 4 | Off | Novel | 0 |
| 4 | Off | Novel | 4 | Off | Bob | 0 |
| 4 | On | Bob | 4 | On | Novel | 0 |
| 4 | On | Novel | 4 | On | Bob | 0 |

*Factor 1* = Wristband, *Factor 2* = Target.

Supplemental Table S3

*Internal Meta-Analysis 2: Wristband x Context x Target on Speeded Evaluations*

*Study Factor 1 Factor 2 Factor 3 M SD N wi*

| 1 | Off | Neg | Bob | 0.625675 | 0.366436 | 245 | 1 |
| --- | --- | --- | --- | --- | --- | --- | --- |
| 1 | Off | Neg | Novel | 0.529041 | 0.299695 | 245 | 1 |
| 1 | Off | New | Bob | 0.66053 | 0.358971 | 245 | 1 |
| 1 | Off | New | Novel | 0.564438 | 0.290991 | 245 | 1 |
| 1 | Off | Pos | Bob | 0.490394 | 0.380695 | 245 | 1 |
| 1 | Off | Pos | Novel | 0.410842 | 0.302854 | 245 | 1 |
| 1 | On | Neg | Bob | 0.619313 | 0.381439 | 245 | 1 |
| 1 | On | Neg | Novel | 0.512389 | 0.299318 | 245 | 1 |
| 1 | On | New | Bob | 0.659538 | 0.371966 | 245 | 1 |
| 1 | On | New | Novel | 0.547029 | 0.32331 | 245 | 1 |
| 1 | On | Pos | Bob | 0.467374 | 0.378689 | 245 | 1 |
| 1 | On | Pos | Novel | 0.39972 | 0.288108 | 245 | 1 |
| 2 | Off | Neg | Bob | 0.51181 | 0.377712 | 234 | 2 |
| 2 | Off | Neg | Novel | 0.478614 | 0.305942 | 234 | 2 |
| 2 | Off | New | Bob | 0.516375 | 0.380993 | 234 | 2 |
| 2 | Off | New | Novel | 0.51393 | 0.308942 | 234 | 2 |
| 2 | Off | Pos | Bob | 0.444156 | 0.367726 | 234 | 2 |
| 2 | Off | Pos | Novel | 0.445143 | 0.29689 | 234 | 2 |
| 2 | On | Neg | Bob | 0.456125 | 0.379432 | 234 | 2 |
| 2 | On | Neg | Novel | 0.52499 | 0.325813 | 234 | 2 |
| 2 | On | New | Bob | 0.470335 | 0.401424 | 234 | 2 |
| 2 | On | New | Novel | 0.546942 | 0.324402 | 234 | 2 |
| 2 | On | Pos | Bob | 0.3656 | 0.364373 | 234 | 2 |
| 2 | On | Pos | Novel | 0.448094 | 0.313212 | 234 | 2 |
| 3 | Off | Neg | Bob | 0.42186 | 0.366757 | 122 | 3 |
| 3 | Off | Neg | Novel | 0.488254 | 0.281159 | 122 | 3 |
| 3 | Off | New | Bob | 0.452457 | 0.378399 | 122 | 3 |
| 3 | Off | New | Novel | 0.501709 | 0.282086 | 122 | 3 |
| 3 | Off | Pos | Bob | 0.3842 | 0.354217 | 122 | 3 |
| 3 | Off | Pos | Novel | 0.435448 | 0.283147 | 122 | 3 |
| 3 | On | Neg | Bob | 0.461376 | 0.378215 | 118 | 4 |
| 3 | On | Neg | Novel | 0.504697 | 0.272685 | 118 | 4 |
| 3 | On | New | Bob | 0.493238 | 0.381356 | 118 | 4 |
| 3 | On | New | Novel | 0.509045 | 0.270652 | 118 | 4 |
| 3 | On | Pos | Bob | 0.395402 | 0.363486 | 118 | 4 |
| 3 | On | Pos | Novel | 0.429014 | 0.259905 | 118 | 4 |

*Factor 1* = Wristband, *Factor 2* = Context, *Factor 3 =* Target, *wi* = Within-subjects indicator, *Neg* = negative context, *New* = novel context, *Pos* = positive context.

Supplemental Table S4

*Internal Meta-Analysis 2: Estimated Variance-Covariance Matrix*

| *Study* | *Factor1* | *Factor2* |  | *Factor3* | *Study* | *Factor1* | *Factor2* | *Factor3* | *Covariance* | |
| --- | --- | --- | --- | --- | --- | --- | --- | --- | --- | --- |
| 1 | Off | Neg |  | Bob | 1 | Off | Neg | Novel | 0.022162 | |
| 1 | Off | Neg |  | Bob | 1 | Off | New | Bob | 0.097335 | |
| 1 | Off | Neg |  | Bob | 1 | Off | New | Novel | 0 | |
| 1 | Off | Neg |  | Bob | 1 | Off | Pos | Bob | 0.089654 | |
| 1 | Off | Neg |  | Bob | 1 | Off | Pos | Novel | 0 | |
| 1 | Off | Neg |  | Bob | 1 | On | Neg | Bob | 0.120902 | |
| 1 | Off | Neg |  | Bob | 1 | On | Neg | Novel | 0.023512 | |
| 1 | Off | Neg |  | Bob | 1 | On | New | Bob | 0.092348 | |
| 1 | Off | Neg |  | Bob | 1 | On | New | Novel | 0 | |
| 1 | Off | Neg |  | Bob | 1 | On | Pos | Bob | 0.084898 | |
| 1 | Off | Neg |  | Bob | 1 | On | Pos | Novel | 0 | |
| 1 | Off | Neg |  | Novel | 1 | Off | New | Bob | 0 | |
| 1 | Off | Neg |  | Novel | 1 | Off | New | Novel | 0.048874 | |
| 1 | Off | Neg |  | Novel | 1 | Off | Pos | Bob | 0 | |
| 1 | Off | Neg |  | Novel | 1 | Off | Pos | Novel | 0.04478 | |
| 1 | Off | Neg |  | Novel | 1 | On | Neg | Bob | 0.018106 | |
| 1 | Off | Neg |  | Novel | 1 | On | Neg | Novel | 0.062493 | |
| 1 | Off | Neg |  | Novel | 1 | On | New | Bob | 0 | |
| 1 | Off | Neg |  | Novel | 1 | On | New | Novel | 0.046121 | |
| 1 | Off | Neg |  | Novel | 1 | On | Pos | Bob | 0 | |
| 1 | Off | Neg |  | Novel | 1 | On | Pos | Novel | 0.039857 | |
| 1 | Off | New |  | Bob | 1 | Off | New | Novel | 0.013315 | |
| 1 | Off | New |  | Bob | 1 | Off | Pos | Bob | 0.112282 | |
| 1 | Off | New |  | Bob | 1 | Off | Pos | Novel | 0.005022 | |
| 1 | Off | New |  | Bob | 1 | On | Neg | Bob | 0.091788 | |
| 1 | Off | New |  | Bob | 1 | On | Neg | Novel | 0 | |
| 1 | Off | New |  | Bob | 1 | On | New | Bob | 0.115306 | |
| 1 | Off | New |  | Bob | 1 | On | New | Novel | 0.010504 | |
| 1 | Off | New |  | Bob | 1 | On | Pos | Bob | 0.105848 | |
| 1 | Off | New |  | Bob | 1 | On | Pos | Novel | 0.006238 | |
| 1 | Off | New |  | Novel | 1 | Off | Pos | Bob | 0.004264 | |
| 1 | Off | New |  | Novel | 1 | Off | Pos | Novel | 0.063068 | |
| 1 | Off | New |  | Novel | 1 | On | Neg | Bob | 0 | |
| 1 | Off | New |  | Novel | 1 | On | Neg | Novel | 0.043184 | |
| 1 | Off | New |  | Novel | 1 | On | New | Bob | 0.004687 | |
| 1 | Off | New |  | Novel | 1 | On | New | Novel | 0.059873 | |
| 1 | Off | New |  | Novel | 1 | On | Pos | Bob | 0.000369 | |
| 1 | Off | New |  | Novel | 1 | On | Pos | Novel | 0.05918 | |
| 1 | Off | Pos |  | Bob | 1 | Off | Pos | Novel | 0.010653 | |
| 1 | Off | Pos |  | Bob | 1 | On | Neg | Bob | 0.084275 | |
| 1 | Off | Pos |  | Bob | 1 | On | Neg | Novel | 0 |
| 1 | Off | Pos |  | Bob | 1 | On | New | Bob | 0.109442 |
| 1 | Off | Pos |  | Bob | 1 | On | New | Novel | 0.002294 |
| 1 | Off | Pos |  | Bob | 1 | On | Pos | Bob | 0.116018 |
| 1 | Off | Pos |  | Bob | 1 | On | Pos | Novel | 0.015292 |
| 1 | Off | Pos |  | Novel | 1 | On | Neg | Bob | 0 |
| 1 | Off | Pos |  | Novel | 1 | On | Neg | Novel | 0.038845 |
| 1 | Off | Pos |  | Novel | 1 | On | New | Bob | 0.000175 |
| 1 | Off | Pos |  | Novel | 1 | On | New | Novel | 0.049912 |
| 1 | Off | Pos |  | Novel | 1 | On | Pos | Bob | 0.008182 |
| 1 | Off | Pos |  | Novel | 1 | On | Pos | Novel | 0.065953 |
| 1 | On | Neg |  | Bob | 1 | On | Neg | Novel | 0.020363 |
| 1 | On | Neg |  | Bob | 1 | On | New | Bob | 0.096421 |
| 1 | On | Neg |  | Bob | 1 | On | New | Novel | 0 |
| 1 | On | Neg |  | Bob | 1 | On | Pos | Bob | 0.083926 |
| 1 | On | Neg |  | Bob | 1 | On | Pos | Novel | 0 |
| 1 | On | Neg |  | Novel | 1 | On | New | Bob | 0 |
| 1 | On | Neg |  | Novel | 1 | On | New | Novel | 0.048359 |
| 1 | On | Neg |  | Novel | 1 | On | Pos | Bob | 0 |
| 1 | On | Neg |  | Novel | 1 | On | Pos | Novel | 0.042589 |
| 1 | On | New |  | Bob | 1 | On | New | Novel | 0.014953 |
| 1 | On | New |  | Bob | 1 | On | Pos | Bob | 0.113757 |
| 1 | On | New |  | Bob | 1 | On | Pos | Novel | 0.005893 |
| 1 | On | New |  | Novel | 1 | On | Pos | Bob | 0 |
| 1 | On | New |  | Novel | 1 | On | Pos | Novel | 0.066584 |
| 1 | On | Pos |  | Bob | 1 | On | Pos | Novel | 0.019868 |
| 2 | Off | Neg |  | Bob | 2 | Off | Neg | Novel | 0 |
| 2 | Off | Neg |  | Bob | 2 | Off | New | Bob | 0.106656 |
| 2 | Off | Neg |  | Bob | 2 | Off | New | Novel | 0 |
| 2 | Off | Neg |  | Bob | 2 | Off | Pos | Bob | 0.103849 |
| 2 | Off | Neg |  | Bob | 2 | Off | Pos | Novel | 0 |
| 2 | Off | Neg |  | Bob | 2 | On | Neg | Bob | 0.104729 |
| 2 | Off | Neg |  | Bob | 2 | On | Neg | Novel | 0 |
| 2 | Off | Neg |  | Bob | 2 | On | New | Bob | 0.094972 |
| 2 | Off | Neg |  | Bob | 2 | On | New | Novel | 0 |
| 2 | Off | Neg |  | Bob | 2 | On | Pos | Bob | 0.095699 |
| 2 | Off | Neg |  | Bob | 2 | On | Pos | Novel | 0 |
| 2 | Off | Neg |  | Novel | 2 | Off | New | Bob | 0 |
| 2 | Off | Neg |  | Novel | 2 | Off | New | Novel | 0.054694 |
| 2 | Off | Neg |  | Novel | 2 | Off | Pos | Bob | 0 |
| 2 | Off | Neg |  | Novel | 2 | Off | Pos | Novel | 0.052198 |
| 2 | Off | Neg |  | Novel | 2 | On | Neg | Bob | 0 |
| 2 | Off | Neg |  | Novel | 2 | On | Neg | Novel | 0.062329 |
| 2 | Off | Neg |  | Novel | 2 | On | New | Bob | 0 |
| 2 | Off | Neg |  | Novel | 2 | On | New | Novel | 0.058368 |
| 2 | Off | Neg |  | Novel | 2 | On | Pos | Bob | 0 |
| 2 | Off | Neg |  | Novel | 2 | On | Pos | Novel | 0.043128 |
| 2 | Off | New |  | Bob | 2 | Off | New | Novel | 0 |
| 2 | Off | New |  | Bob | 2 | Off | Pos | Bob | 0.123527 |
| 2 | Off | New |  | Bob | 2 | Off | Pos | Novel | 0 |
| 2 | Off | New |  | Bob | 2 | On | Neg | Bob | 0.095785 |
| 2 | Off | New |  | Bob | 2 | On | Neg | Novel | 0 |
| 2 | Off | New |  | Bob | 2 | On | New | Bob | 0.114226 |
| 2 | Off | New |  | Bob | 2 | On | New | Novel | 0 |
| 2 | Off | New |  | Bob | 2 | On | Pos | Bob | 0.113959 |
| 2 | Off | New |  | Bob | 2 | On | Pos | Novel | 0 |
| 2 | Off | New |  | Novel | 2 | Off | Pos | Bob | 0 |
| 2 | Off | New |  | Novel | 2 | Off | Pos | Novel | 0.063917 |
| 2 | Off | New |  | Novel | 2 | On | Neg | Bob | 0 |
| 2 | Off | New |  | Novel | 2 | On | Neg | Novel | 0.052112 |
| 2 | Off | New |  | Novel | 2 | On | New | Bob | 0 |
| 2 | Off | New |  | Novel | 2 | On | New | Novel | 0.066687 |
| 2 | Off | New |  | Novel | 2 | On | Pos | Bob | 0 |
| 2 | Off | New |  | Novel | 2 | On | Pos | Novel | 0.057683 |
| 2 | Off | Pos |  | Bob | 2 | Off | Pos | Novel | 0.007942 |
| 2 | Off | Pos |  | Bob | 2 | On | Neg | Bob | 0.093389 |
| 2 | Off | Pos |  | Bob | 2 | On | Neg | Novel | 0 |
| 2 | Off | Pos |  | Bob | 2 | On | New | Bob | 0.107422 |
| 2 | Off | Pos |  | Bob | 2 | On | New | Novel | 0 |
| 2 | Off | Pos |  | Bob | 2 | On | Pos | Bob | 0.127144 |
| 2 | Off | Pos |  | Bob | 2 | On | Pos | Novel | 0.005194 |
| 2 | Off | Pos |  | Novel | 2 | On | Neg | Bob | 0 |
| 2 | Off | Pos |  | Novel | 2 | On | Neg | Novel | 0.044145 |
| 2 | Off | Pos |  | Novel | 2 | On | New | Bob | 0 |
| 2 | Off | Pos |  | Novel | 2 | On | New | Novel | 0.060257 |
| 2 | Off | Pos |  | Novel | 2 | On | Pos | Bob | 0.007923 |
| 2 | Off | Pos |  | Novel | 2 | On | Pos | Novel | 0.069728 |
| 2 | On | Neg |  | Bob | 2 | On | Neg | Novel | 0.003388 |
| 2 | On | Neg |  | Bob | 2 | On | New | Bob | 0.103623 |
| 2 | On | Neg |  | Bob | 2 | On | New | Novel | 0 |
| 2 | On | Neg |  | Bob | 2 | On | Pos | Bob | 0.101087 |
| 2 | On | Neg |  | Bob | 2 | On | Pos | Novel | 0 |
| 2 | On | Neg |  | Novel | 2 | On | New | Bob | 0 |
| 2 | On | Neg |  | Novel | 2 | On | New | Novel | 0.066675 |
| 2 | On | Neg |  | Novel | 2 | On | Pos | Bob | 0 |
| 2 | On | Neg |  | Novel | 2 | On | Pos | Novel | 0.053138 |
| 2 | On | New |  | Bob | 2 | On | New | Novel | 0.002144 |
| 2 | On | New |  | Bob | 2 | On | Pos | Bob | 0.12008 |
| 2 | On | New |  | Bob | 2 | On | Pos | Novel | 0 |
| 2 | On | New |  | Novel | 2 | On | Pos | Bob | 0 |
| 2 | On | New |  | Novel | 2 | On | Pos | Novel | 0.076969 |
| 2 | On | Pos |  | Bob | 2 | On | Pos | Novel | 0.007463 |
| 3 | Off | Neg |  | Bob | 3 | Off | Neg | Novel | 0 |
| 3 | Off | Neg |  | Bob | 3 | Off | New | Bob | 0.105901 |
| 3 | Off | Neg |  | Bob | 3 | Off | New | Novel | 0 |
| 3 | Off | Neg |  | Bob | 3 | Off | Pos | Bob | 0.10433 |
| 3 | Off | Neg |  | Bob | 3 | Off | Pos | Novel | 0 |
| 3 | Off | Neg |  | Novel | 3 | Off | New | Bob | 0 |
| 3 | Off | Neg |  | Novel | 3 | Off | New | Novel | 0.055504 |
| 3 | Off | Neg |  | Novel | 3 | Off | Pos | Bob | 0 |
| 3 | Off | Neg |  | Novel | 3 | Off | Pos | Novel | 0.045389 |
| 3 | Off | New |  | Bob | 3 | Off | New | Novel | 0 |
| 3 | Off | New |  | Bob | 3 | Off | Pos | Bob | 0.119579 |
| 3 | Off | New |  | Bob | 3 | Off | Pos | Novel | 0 |
| 3 | Off | New |  | Novel | 3 | Off | Pos | Bob | 0 |
| 3 | Off | New |  | Novel | 3 | Off | Pos | Novel | 0.055693 |
| 3 | Off | Pos |  | Bob | 3 | Off | Pos | Novel | 0.006168 |
| 3 | On | Neg |  | Bob | 3 | On | Neg | Novel | 0.003898 |
| 3 | On | Neg |  | Bob | 3 | On | New | Bob | 0.116328 |
| 3 | On | Neg |  | Bob | 3 | On | New | Novel | 0 |
| 3 | On | Neg |  | Bob | 3 | On | Pos | Bob | 0.108174 |
| 3 | On | Neg |  | Bob | 3 | On | Pos | Novel | 0 |
| 3 | On | Neg |  | Novel | 3 | On | New | Bob | 0 |
| 3 | On | Neg |  | Novel | 3 | On | New | Novel | 0.047649 |
| 3 | On | Neg |  | Novel | 3 | On | Pos | Bob | 0 |
| 3 | On | Neg |  | Novel | 3 | On | Pos | Novel | 0.04069 |
| 3 | On | New |  | Bob | 3 | On | New | Novel | 0.01161 |
| 3 | On | New |  | Bob | 3 | On | Pos | Bob | 0.129154 |
| 3 | On | New |  | Bob | 3 | On | Pos | Novel | 0.006334 |
| 3 | On | New |  | Novel | 3 | On | Pos | Bob | 0 |
| 3 | On | New |  | Novel | 3 | On | Pos | Novel | 0.057564 |
| 3 | On | Pos |  | Bob | 3 | On | Pos | Novel | 0.01035 |

*Factor 1* = Wristband. *Factor 2* = Context. *Factor 3* = Target, *Neg* = Negative context, *New* = Novel context, *Pos* = Positive context.

Supplemental Table S5

*Internal Meta-Analysis 3: Effect of Wristband on Deliberate Evaluations.*

| Study | Factor1 | *M* | *SD* | *N* |
| --- | --- | --- | --- | --- |
| 1 | Off | 41.5 | 18.18 | 81 |
| 1 | On | 42.34 | 17.09 | 73 |
| 2 | Off | 4.98708 | 2.20276 | 128 |
| 2 | On | 4.85632 | 2.04052 | 114 |
| 3 | Off | 4.72541 | 2.27212 | 122 |
| 3 | On | 4.68503 | 2.28356 | 118 |

Factor 1 = Wristband.

Supplemental Table S6

*Internal Meta-Analysis 4: Wristband x Context on Deliberate Evaluations*

| *Study* | *Factor1* | *Factor2* | *M* | *SD* | *N* | *wi* |
| --- | --- | --- | --- | --- | --- | --- |
| 1 | Off | Neg | 3.953488 | 2.117119 | 129 | 1 |
| 1 | Off | New | 5.209302 | 1.881964 | 129 | 1 |
| 1 | Off | Pos | 5.79845 | 2.195093 | 129 | 1 |
| 1 | On | Neg | 3.810345 | 1.778684 | 116 | 2 |
| 1 | On | New | 5.077586 | 1.856368 | 116 | 2 |
| 1 | On | Pos | 5.681034 | 2.028489 | 116 | 2 |
| 2 | Off | Neg | 4.311475 | 1.712048 | 122 | 3 |
| 2 | Off | New | 4.848361 | 1.378539 | 122 | 3 |
| 2 | Off | Pos | 5.016393 | 1.688481 | 122 | 3 |
| 2 | On | Neg | 4.266949 | 1.62602 | 118 | 4 |
| 2 | On | New | 4.711864 | 1.530888 | 118 | 4 |
| 2 | On | Pos | 5.076271 | 1.734057 | 118 | 4 |

*Factor 1* = Wristband, *Factor 2* = Context, *wi* = Within-subjects indicator, *Neg* = Negative context, *New* = Novel context, *Pos* = Positive context.

Supplemental Table S7

*Internal Meta-Analysis 4: Estimated Variance-Covariance Matrix.*

| *Study* | | *Factor1* | | *Factor2* | | *Study* | | *Factor1* | | *Factor2* | | *Covariance* | |
| --- | --- | --- | --- | --- | --- | --- | --- | --- | --- | --- | --- | --- | --- |
| 1 | | Off | | Neg | | 1 | | Off | | New | | 2.181686 | |
| 1 | | Off | | Neg | | 1 | | Off | | Pos | | 0.881177 | |
| 1 | | Off | | New | | 1 | | Off | | Pos | | 2.948765 | |
| 1 | | On | | Neg | | 1 | | On | | New | | 1.675712 | |
| 1 | | On | | Neg | | 1 | | On | | Pos | | 1.078111 | |
| 1 | | On | | New | | 1 | | On | | Pos | | 2.459745 | |
| 2 | | Off | | Neg | | 2 | | Off | | New | | 1.169523 | |
| 2 | | Off | | Neg | | 2 | | Off | | Pos | | 0.779976 | |
| 2 | | Off | | New | | 2 | | Off | | Pos | | 0.961184 | |
| 2 | | On | | Neg | | 2 | | On | | New | | 1.190823 | |
| 2 | | On | | Neg | | 2 | | On | | Pos | | 1.020064 | |
| 2 | | On | | New | | 2 | | On | | Pos | | 1.447378 | |

*Factor 1* = Wristband, *Factor 2* = Context, *Neg* = Negative context, *New* = Novel context, *Pos* = Positive context.
